# Supplementary material for: Low phosphatase activity of LiaS and strong LiaR-DNA affinity explain the unusual LiaS to LiaR in vivo stoichiometry
Source: PubMed Central journal article supplement (PMC7191749; doi:10.1186/s12866-020-01796-6), 2020-04-29
Supplement: 12866_2020_1796_MOESM4_ESM.pdf [file 12866_2020_1796_MOESM4_ESM.pdf]

### Additional File 4

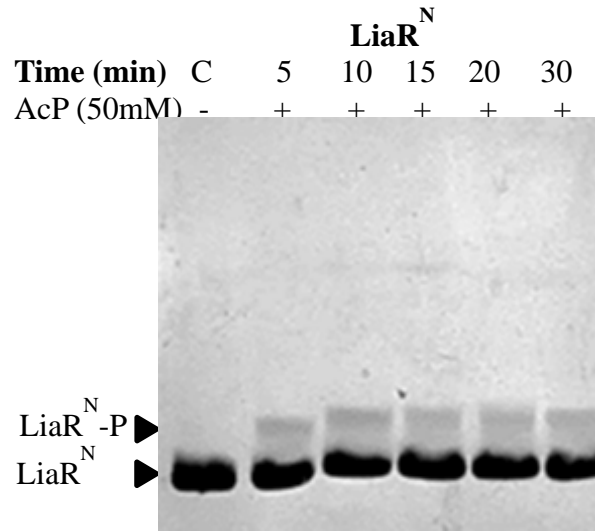

Fig. S4. Phosphorylation of LiaR<sup>N</sup> by acetyl phosphate. LiaR<sup>N</sup> at 30  $\mu$ M was incubated with 50 mM acetyl phosphate in PB at different time intervals. The reaction was quenched by the addition of SDS-PAGE loading dye. Reaction samples were analyzed in a 18% SDS-PAGE containing Phospho-TagT<sup>M</sup>. Gels were quantified by densitometry of bands using ImageJ.
