# Supplementary material for: Low phosphatase activity of LiaS and strong LiaR-DNA affinity explain the unusual LiaS to LiaR in vivo stoichiometry
Source: PubMed Central journal article supplement (PMC7191749; doi:10.1186/s12866-020-01796-6), 2020-04-29
Supplement: 12866_2020_1796_MOESM5_ESM.pdf [file 12866_2020_1796_MOESM5_ESM.pdf]

## Additional File 5

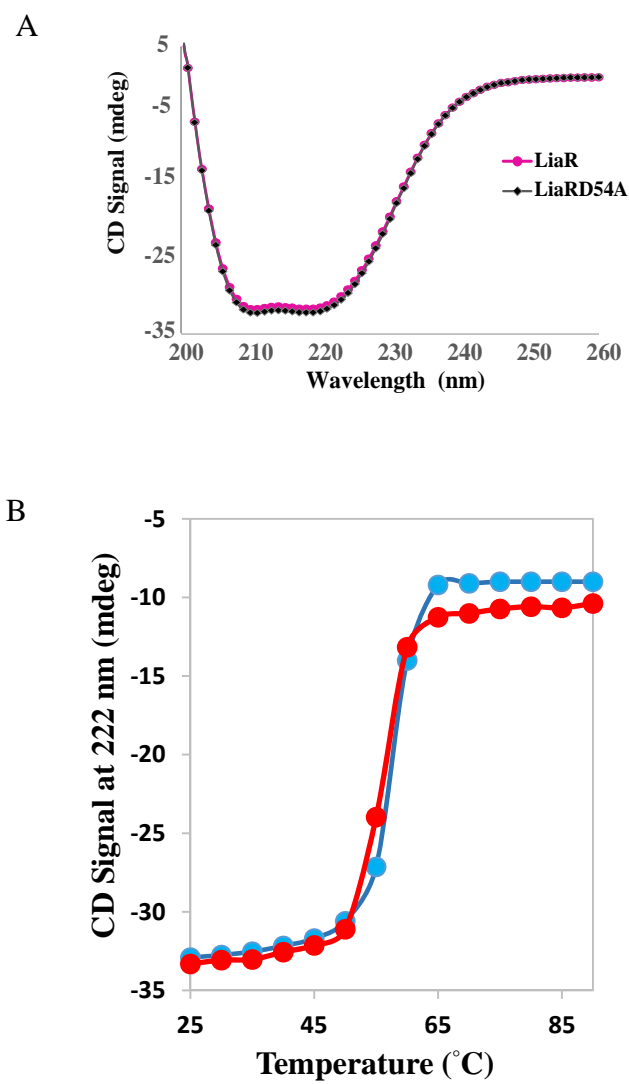

Fig. S5. CD studies on LiaR and LiaRD54A variant. **(A)** The CD spectra of LiaR and LiaRD54A. Briefly, each protein at 10  $\mu$ M was prepared in 50 mM Tris, 5 mM MgCl<sub>2</sub> at pH 7.0. **(B)** The thermal melting of LiaR (blue dots) and LiaRD54A (red dots). The samples were prepared similarly as for panel (A).
