# Supplementary material for: Low phosphatase activity of LiaS and strong LiaR-DNA affinity explain the unusual LiaS to LiaR in vivo stoichiometry
Source: PubMed Central journal article supplement (PMC7191749; doi:10.1186/s12866-020-01796-6), 2020-04-29
Supplement: 12866_2020_1796_MOESM7_ESM.pdf [file 12866_2020_1796_MOESM7_ESM.pdf]

## Additional File 7

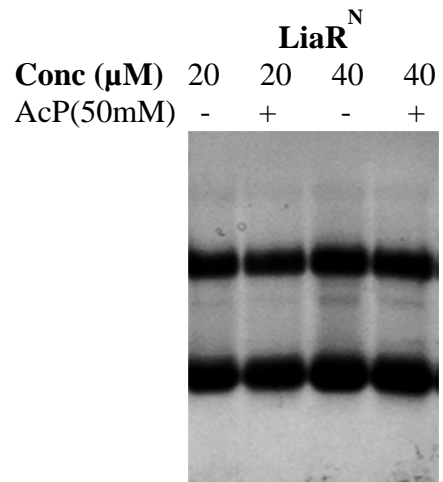

Fig. S7. Oligomerization studies on LiaR<sup>N</sup>. The oligomerization state of LiaR<sup>N</sup> was analyzed by a 15% native-PAGE. Samples with or without acetyl phosphate (AcP) were incubated for 1 h in PB, at room temperature, and were resolved by gel electrophoresis.
