# Supplementary material for: Low phosphatase activity of LiaS and strong LiaR-DNA affinity explain the unusual LiaS to LiaR in vivo stoichiometry
Source: PubMed Central journal article supplement (PMC7191749; doi:10.1186/s12866-020-01796-6), 2020-04-29
Supplement: 12866_2020_1796_MOESM8_ESM.pdf [file 12866_2020_1796_MOESM8_ESM.pdf]

## Additional File 8

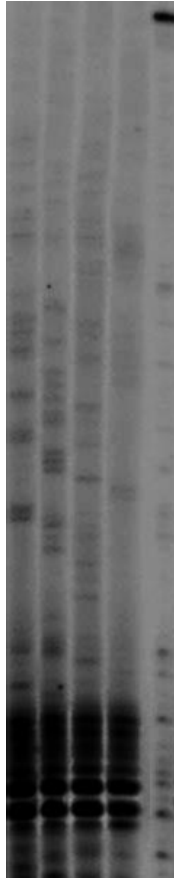

Fig. S8. Standard reactions using di-deoxynucleotides and  $P_{liaI}$  to determine the LiaR binding sequence in  $P_{liaI}$ . Lanes 1 to 4, are the standard reactions with the dideoxynucleotides ddCTP, ddGTP, ddTTP and ddATP, respectively, 5' [ $^{32}\text{P}$ ]-end labelled forward primer, and  $P_{liaI}$  as a template. Lane 5, is the  $P_{liaI}$  digested with DNase I. The DNA fragment was radiolabelled at the top strand (at the 5'-end).
